# Supplementary material
Source: MDPI journal article supplement (https://www.mdpi.com/2073-4441/9/12/958)
Supplement: s1 [file s1]

# Supplementary Materials

## Contents

|                                                                                |     |
|--------------------------------------------------------------------------------|-----|
| Documentation of the characterization of water management options.....         | 1   |
| Table S1: Descriptors used to characterize water management options.....       | 1   |
| Documentation of the Fuzzy Cognitive Map for the Pedieos river basin.....      | 6   |
| Figure S1: Fuzzy Cognitive Map developed for the Pedieos river basin. ....     | 6   |
| Table S2: Definition of the factors for the Pedieos river basin.....           | 6   |
| Table S3: Documentation of the relationships for the Pedieos river basin ..... | 7   |
| Documentation of the Fuzzy Cognitive Map for the Rmel river basin .....        | 111 |
| Figure S2: Fuzzy Cognitive Map developed for the Rmel river basin. ....        | 111 |
| Table S4: Definition of the factors for the Rmel river basin .....             | 111 |
| Table S5: Documentation of the relationships for the Rmel river basin.....     | 122 |
| Documentation of the Fuzzy Cognitive Map for the Tordera river basin .....     | 155 |
| Figure S3: Fuzzy Cognitive Map developed for the Tordera river basin.....      | 155 |
| Table S6: Definition of the factors for the Tordera river basin .....          | 155 |
| Table S7: Documentation of the relationships for the Tordera river basin.....  | 166 |
| Documentation of the Fuzzy Cognitive Map for the Vipava river basin.....       | 20  |
| Figure S4: Fuzzy Cognitive Map developed for the Vipava river basin. ....      | 20  |
| Table S8: Definition of the factors for the Vipava river basin.....            | 20  |
| Table S9: Documentation of the relationships for the Vipava river basin .....  | 211 |

## Documentation of the characterization of water management options

**Table S1: Descriptors used to characterize water management options**

| Attribute     | Classes                       | Description                                                     |
|---------------|-------------------------------|-----------------------------------------------------------------|
| Water status  | Quantity                      | Option targets the availability of water                        |
|               | Chemical quality              | Option targets the chemical properties of water                 |
|               | Ecological quality            | Option targets biological quality of surface water              |
|               | Hydrogeomorphological quality | Option targets hydromorphological quality of the fluvial system |
| Water bodies  | Surface water                 | Option targets surface water                                    |
|               | Groundwater                   | Option targets groundwater                                      |
| River section | Up                            | Option targets the upper section of the river basin             |
|               | Middle                        | Option targets the middle section of the river basin            |
|               | Down                          | Option targets the down section of the river basin              |
|               | River as a whole              | Option targets the whole river basin                            |

|                         |                             |                                                                                                                                                                              |
|-------------------------|-----------------------------|------------------------------------------------------------------------------------------------------------------------------------------------------------------------------|
| Target water use sector | Local population            | Option targets the water needed or used by residents within the basin                                                                                                        |
|                         | Tourism                     | Option targets the water needed or used by the touristic/recreation sector within the basin                                                                                  |
|                         | Industry                    | Option targets the water needed or used by industry within the basin                                                                                                         |
|                         | Agriculture                 | Option targets the water needed or used by farmers within the basin                                                                                                          |
|                         | Forestry                    | Option targets the water needed or used by trees within the basin                                                                                                            |
|                         | Energy                      | Option targets the water needed or used by the energy sector within the basin                                                                                                |
|                         | Water management            | Option targets authorities responsible for water quantity and quality (e.g. waste treatment, issuing water permits)                                                          |
|                         | Others                      | Option targets water use sectors different from the previous ( <i>please specify at the end of the row the specific sector</i> )                                             |
| Target land use         | Arable land (rainfed)       | Land that is being farmed with crops that are sown and harvested within the same agricultural year, relying exclusively or rain water                                        |
|                         | Arable land (irrigated)     | Land that is being farmed with crops that are sown and harvested within the same agricultural year, relying exclusively irrigation water                                     |
|                         | Permanent crops (rainfed)   | Land that is being farmed with crops which last for many seasons, rather than being replanted after each harvest, relying exclusively or rain water                          |
|                         | Permanent crops (irrigated) | Land that is being farmed with crops which last for many seasons, rather than being replanted after each harvest, relying exclusively irrigation water                       |
|                         | Grassland                   | Land that is dominated by grasses or shrubs for grazing or fodder purposes                                                                                                   |
|                         | Forests                     | Land that is predominantly covered by trees                                                                                                                                  |
|                         | Built-up                    | Land that is used for housing, industry (incl urban fabric, industrial/commercial areas, transport networks, mineral extraction sites, dump sites, construction sites, etc.) |
|                         | Wetlands & deltas           | Swamps and marshes, estuaries, deltas and tidal flats, near-shore marine areas and human-made sites such as reservoirs                                                       |

|                                                  |                            |                                                                                                                       |
|--------------------------------------------------|----------------------------|-----------------------------------------------------------------------------------------------------------------------|
|                                                  | Beaches and dunes          | Sands and muds from the coasts of the oceans not covered by sea water at low tide                                     |
|                                                  | Other                      | Land that is used for other purposes                                                                                  |
| Extreme events                                   | Drought                    | Option targets droughts                                                                                               |
|                                                  | Flooding                   | Option targets floodings                                                                                              |
|                                                  | Storm                      | Option targets storms                                                                                                 |
|                                                  | Fire                       | Option targets wildfires                                                                                              |
|                                                  | Not related                | Option does not target an extreme event                                                                               |
| Implementation scale                             | National                   | Option is to be implemented at national level                                                                         |
|                                                  | Regional                   | Option is to be implemented at regional level                                                                         |
|                                                  | Basin                      | Option is to be implemented at basin level                                                                            |
|                                                  | Municipal                  | Option is to be implemented at municipal level                                                                        |
| Implementation time horizon                      | Short                      | Option can be functioning on short term (<5yrs)                                                                       |
|                                                  | Medium                     | Option can be functioning on medium term (5-20 yrs)                                                                   |
|                                                  | Long                       | Option can be functioning on long term (>20 yrs)                                                                      |
| Expected lifetime                                | Short (< 5 years)          | Expected time for which the option is operational without major rehabilitation is short (less than 5 years)           |
|                                                  | Medium (5 -20 years)       | Expected time for which the option is operational without major rehabilitation is medium (5 - 20 years)               |
|                                                  | Long (> 20 years)          | Expected time for which the option is operational without major rehabilitation is long (more than 20 years)           |
| Timelag between implementation and effectiveness | Short (< 5 years)          | Expected time since the option is implemented until it starts to have the desired effect is short (less than 5 years) |
|                                                  | Medium (5 -20 years)       | Expected time since the option is implemented until it starts to have the desired effect is short (less than 5 years) |
|                                                  | Long (> 20 years)          | Expected time since the option is implemented until it starts to have the desired effect is long (more than 20 years) |
| Character                                        | Demand                     | Option targets the need for water                                                                                     |
|                                                  | Supply                     | Option targets the availability of water                                                                              |
|                                                  | Support                    | Option targets improved governance (incl. awareness raising, monitoring, stakeholder involvement)                     |
|                                                  | Environmental conservation | Option targets the recovery of the ecological status                                                                  |
| Implementation costs<br>(one-time set up cost of | < 10,000 €                 | Direct capital costs of implementing the option are below 10,000 €                                                    |
|                                                  | 10,000 - 100,000 €         | Direct capital costs of implementing the option are in the range 10,000-100,000 €                                     |

|                                                                                                         |                            |                                                                                              |
|---------------------------------------------------------------------------------------------------------|----------------------------|----------------------------------------------------------------------------------------------|
| <i>implementing the measure, after which there will only be recurring operational or running costs)</i> | 100,000 - 1,000,000 €      | Direct capital costs of implementing the option are in the range 100,000-1,000,000 €         |
|                                                                                                         | > 1,000,000 €              | Direct capital costs of implementing the option are over 1,000,000 €                         |
| Operational costs (costs incurred annually to maintain the measure operating)                           | < 10,000 € / yr            | Total annual running costs for this option are below 10,000 €                                |
|                                                                                                         | 10,000 - 100,000 € / yr    | Total annual running costs for this option are in the range 10,000-100,000 €                 |
|                                                                                                         | 100,000 - 1,000,000 € / yr | Total annual running costs for this option are in the range 100,000-1,000,000 €              |
|                                                                                                         | > 1,000,000 € / yr         | Total annual running costs for this option are over 1,000,000 €                              |
| Effectiveness (capacity to tackle the specified challenge)                                              | High                       | Option is highly effective in tackling the specified challenge                               |
|                                                                                                         | Medium                     | Option is medium effective in tackling the specified challenge                               |
|                                                                                                         | Low                        | Option is low effective in tackling the specified challenge                                  |
|                                                                                                         | Uncertain                  | Uncertainty about how the option may tackle the specified challenge                          |
| Approach to adaptation                                                                                  | Green                      | Ecosystem-based approaches that use services of nature                                       |
|                                                                                                         | Grey                       | Technological and engineering solutions                                                      |
|                                                                                                         | Soft                       | Managerial, legal and policy approaches that change human behaviour and styles of governance |

|                                     |                                                  |                                                                                                                                                                                                       |
|-------------------------------------|--------------------------------------------------|-------------------------------------------------------------------------------------------------------------------------------------------------------------------------------------------------------|
| Nature of approach                  | Bear the loss                                    | Occurs when those affected have no capacity to respond in any other ways                                                                                                                              |
|                                     | Share the loss                                   | Occurs when the losses are shares among a wider community (either extended family or village-level in traditional societies or through public relief, rehabilitation and reconstruction or insurance) |
|                                     | Modify the threat                                | Occurs when the measure exercises a degree of control over the environmental threat itself (e.g. flood control measures such as dikes)                                                                |
|                                     | Prevent effects                                  | Occurs when the option involves steps to prevent the effects of climate change and variability (e.g. modification in crop management practices)                                                       |
|                                     | Change use                                       | Occurs when the continuation of an economic activity is changed due to the difficulty of continuing it (e.g. agricultural use changed into forest use)                                                |
|                                     | Research                                         | Occurs when the option means use of new technologies and new methods of adaptation                                                                                                                    |
|                                     | Educate, inform and encourage behavioural change | Occurs when the option is based on dissemination of knowledge through education, public campaigns leading to behavioural change                                                                       |
| Potential to address climate change | Robustness                                       | An option is considered robust to uncertainties if it can maintain its effectiveness under different climatic and socioeconomic development scenarios.                                                |
|                                     | Flexibility                                      | An option is considered flexible when it can be adjusted/ complemented or reversed when it turns out to be inadequate or inappropriate in practice.                                                   |
| Feasibility                         | No major obstacle                                | No barriers for the implementation                                                                                                                                                                    |
|                                     | Minor obstacles                                  | Physical, technical or organizational obstacles that can easily be overcome                                                                                                                           |
|                                     | Serious obstacles                                | Physical, technical, regulatory or organizational obstacles that would be difficult to overcome within the time horizon of the project                                                                |
| Acceptability (a priori)            | High                                             | There is not significant reason a priori for anyone to reject the option.                                                                                                                             |
|                                     | Low                                              | There are obvious signs that one or several actors of the RB will reject the option because of its design.                                                                                            |

## Documentation of the Fuzzy Cognitive Map for the Pedieos river basin

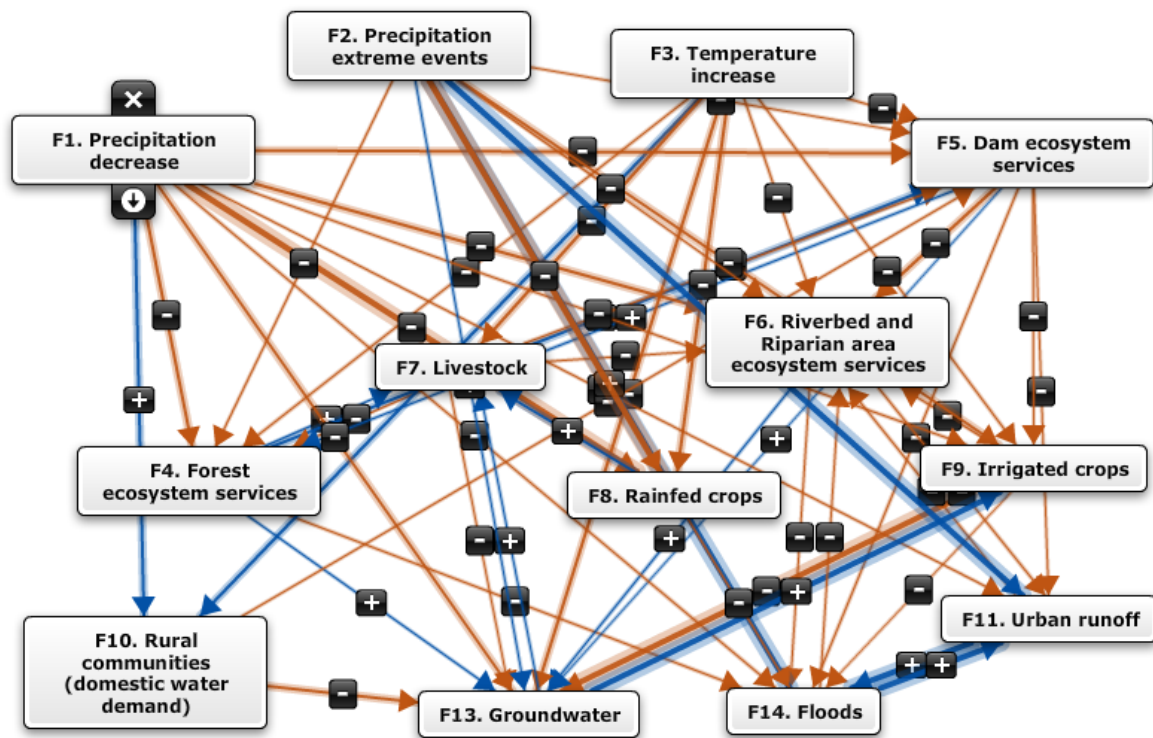

Figure S1: Fuzzy Cognitive Map developed for the Pedieos river basin.

Table S2: Definition of the factors for the Pedieos river basin

| Number | Name of factor                                | Definition                                                                                                                                                                                                                   |
|--------|-----------------------------------------------|------------------------------------------------------------------------------------------------------------------------------------------------------------------------------------------------------------------------------|
| F1     | Temperature increase                          | Overall increase in temperature (1-2 °C), and more hot days (>35 °C) and tropical nights (>22.5 °C).                                                                                                                         |
| F2     | Precipitation decrease                        | Reduction in the average annual rainfall (1-12%) and more very dry years.                                                                                                                                                    |
| F3     | Precipitation extreme events                  | Increase in the number of extreme precipitation events (days with more than 50 mm rain).                                                                                                                                     |
| F4     | Forest ecosystem services                     | Ecosystem services provided by forests, namely, ecological, sociocultural, scenic and landscape services and values, including the regulation of water flows and reduction of erosion.                                       |
| F5     | Dam waterbody ecosystem services              | Quantitative and qualitative status of surface water, related to the ecosystem services provided by the Tamassos dam reservoir, including flood control, water supply, provision of habitat for biodiversity and recreation. |
| F6     | Riverbed and riparian area ecosystem services | Ecosystem services of the river and riparian zones, including sediment and nutrient filtering, water storage and release, aquifer recharge, bank stabilization and provision of habitat for biodiversity.                    |
| F7     | Rainfed cropland                              | Land cultivated with crops that rely on rainfall for water, mainly barley grown during November-April and some olive orchards.                                                                                               |

|            |                                           |                                                                                                                                                                                                       |
|------------|-------------------------------------------|-------------------------------------------------------------------------------------------------------------------------------------------------------------------------------------------------------|
| <b>F8</b>  | Irrigated cropland                        | Land cultivated with irrigated crops such as vegetables, fruit trees and some olive orchards.                                                                                                         |
| <b>F9</b>  | Livestock                                 | Intensive livestock farms, mainly with sheep, goats, chickens, but also cows and horses. Occasional grazing of natural vegetation by sheep and goats in the lower upstream and upper midstream areas. |
| <b>F10</b> | Rural communities (domestic water demand) | Water demand of rural households for drinking and gardens' watering purposes.                                                                                                                         |
| <b>F11</b> | Groundwater                               | Quantitative and qualitative status of groundwater.                                                                                                                                                   |
| <b>F12</b> | Urban runoff                              | Surface runoff of rainwater created by impervious surfaces (roofs, roads, sidewalks etc) and poor urban drainage systems.                                                                             |
| <b>F13</b> | Floods                                    | Flooding from the Pedieos river.                                                                                                                                                                      |

**Table S3: Documentation of the relationships for the Pedieos river basin**

| <b>From</b> | <b>To</b>  | <b>Justification</b>                                                                                                                                                                                                         | <b>Relationship</b>                |
|-------------|------------|------------------------------------------------------------------------------------------------------------------------------------------------------------------------------------------------------------------------------|------------------------------------|
| <b>F1</b>   | <b>F4</b>  | The increase in temperature negatively impacts on the ecosystem services provided by the forests                                                                                                                             | -0.2: weak negative relationship   |
| <b>F1</b>   | <b>F5</b>  | The increase in temperature negatively impacts on the ecosystem services provided by the Tamassos dam reservoir, including mainly the water supply and the provision of habitat for biodiversity                             | -0.2: weak negative relationship   |
| <b>F1</b>   | <b>F6</b>  | The increase in temperature negatively impacts on the ecosystem services of the river and the riparian zones including water storage and release and aquifer recharge.                                                       | -0.2: weak negative relationship   |
| <b>F1</b>   | <b>F7</b>  | The increase in temperature creates strong negative impacts on the rainfed crops that rely on rainfall for water                                                                                                             | -0.5: medium negative relationship |
| <b>F1</b>   | <b>F8</b>  | The increase in temperature negatively impacts on the irrigated crops                                                                                                                                                        | -0.2: weak negative relationship   |
| <b>F1</b>   | <b>F9</b>  | The increase in temperature creates strong negative impacts on livestock                                                                                                                                                     | -0.5: medium negative relationship |
| <b>F1</b>   | <b>F10</b> | The increase in temperature strongly increases the water demand of rural households for drinking and gardens' watering purposes                                                                                              | 0.5: medium positive relationship  |
| <b>F2</b>   | <b>F4</b>  | The reduction in the average annual rainfall creates strong negative impacts on the ecosystem services provided by the forests                                                                                               | -0.5: medium negative relationship |
| <b>F2</b>   | <b>F5</b>  | The reduction in the average annual rainfall creates strong negative impacts on the ecosystem services provided by the Tamassos dam reservoir, including mainly water supply.                                                | -0.5: medium negative relationship |
| <b>F2</b>   | <b>F6</b>  | The reduction in the average annual rainfall creates strong negative impacts on the ecosystem services provided by the river and the riparian zones including mainly the water storage and release and the aquifer recharge. | -0.5: medium negative relationship |

|           |            |                                                                                                                                                                                                                                                                |                                       |
|-----------|------------|----------------------------------------------------------------------------------------------------------------------------------------------------------------------------------------------------------------------------------------------------------------|---------------------------------------|
| <b>F2</b> | <b>F7</b>  | The reduction in the average annual rainfall creates very strong negative impacts on the rainfed crops that rely on rainfall for water                                                                                                                         | -1: very strong negative relationship |
| <b>F2</b> | <b>F8</b>  | The reduction in the average annual rainfall negatively impacts on the irrigated crops                                                                                                                                                                         | -0.2: weak negative relationship      |
| <b>F2</b> | <b>F10</b> | The reduction in the average annual rainfall strongly increases the water demand of rural households for drinking and gardens' watering purposes                                                                                                               | 0.5: medium positive relationship     |
| <b>F2</b> | <b>F11</b> | The reduction in the average annual rainfall creates strong negative impacts on the quantitative status of groundwater.                                                                                                                                        | -0.5: medium negative relationship    |
| <b>F2</b> | <b>F12</b> | The reduction in the average annual rainfall decreases the surface runoff of rainwater in urban areas                                                                                                                                                          | -0.2: weak negative relationship      |
| <b>F3</b> | <b>F4</b>  | An increase in the number of extreme precipitation events affects negatively the ecosystem services provided by the forests.                                                                                                                                   | -0.2: weak negative relationship      |
| <b>F3</b> | <b>F5</b>  | An increase in the number of extreme precipitation events affects negatively the ecosystem services provided by the Tamassos dam, mainly the flood control.                                                                                                    | -0.2: weak negative relationship      |
| <b>F3</b> | <b>F6</b>  | An increase in the number of extreme precipitation events affects negatively the ecosystem services provided by the river and the riparian zones, mainly the bank stabilization and the provision of habitat for biodiversity.                                 | -0.2: weak negative relationship      |
| <b>F3</b> | <b>F7</b>  | An increase in the number of extreme precipitation events creates very strong negative impacts on rainfed crops.                                                                                                                                               | -1: very strong negative relationship |
| <b>F3</b> | <b>F8</b>  | An increase in the number of extreme precipitation events creates strong negative impacts on rainfed crops.                                                                                                                                                    | -0.5: medium negative relationship    |
| <b>F3</b> | <b>F11</b> | An increase in the number of extreme precipitation events improves the quantitative and qualitative status of groundwater resources                                                                                                                            | 0.2: weak positive relationship       |
| <b>F3</b> | <b>F12</b> | An increase in the number of extreme precipitation events very strongly increases the surface urban runoff in urban areas                                                                                                                                      | 1: very strong positive relationship  |
| <b>F3</b> | <b>F13</b> | An increase in the number of extreme precipitation events very strongly increases the flooding from the Pedieos river                                                                                                                                          | 1: very strong positive relationship  |
| <b>F4</b> | <b>F5</b>  | Forest ecosystem services including the regulation of water flows and the reduction of erosion strongly improve the ecosystem services provided by the Tamassos dam reservoir, namely, flood control and provision of habitat for biodiversity and recreation. | 0.5: medium positive relationship     |
| <b>F4</b> | <b>F9</b>  | Forest ecosystem services improve livestock                                                                                                                                                                                                                    | 0.2: weak positive relationship       |

|           |     |                                                                                                                                                                                                                                                                                                                                  |                                       |
|-----------|-----|----------------------------------------------------------------------------------------------------------------------------------------------------------------------------------------------------------------------------------------------------------------------------------------------------------------------------------|---------------------------------------|
| <b>F4</b> | F11 | Forest ecosystem services including the regulation of water flows and the reduction of erosion improve the qualitative and quantitative status of groundwater                                                                                                                                                                    | 0.2: weak positive relationship       |
| <b>F4</b> | F13 | Forest ecosystem services including the regulation of water flows and the reduction of erosion reduces the flooding from the Pedieos river.                                                                                                                                                                                      | -0.2: weak negative relationship      |
| <b>F5</b> | F4  | The ecosystem services provided by the Tamassos dam reservoir positively impact on the ecological, sociocultural, scenic and landscape services of the forests.                                                                                                                                                                  | 0.2: weak positive relationship       |
| <b>F5</b> | F6  | The improvement of the ecosystem services provided by the Tamassos dam reservoir create strong negative effects on the ecosystem services of the river and riparian zones, including sediment and nutrient filtering, water storage and release, aquifer recharge, bank stabilization and provision of habitat for biodiversity. | -0.5: medium negative relationship    |
| <b>F5</b> | F8  | The improvement of the ecosystem services provided by the Tamassos dam reservoir negatively impacts on the irrigated crops since less water is diverted for irrigation                                                                                                                                                           | -0.2: weak negative relationship      |
| <b>F5</b> | F11 | The improvement of the ecosystem services provided by the Tamassos dam reservoir increases the groundwater recharge.                                                                                                                                                                                                             | 0.2: weak positive relationship       |
| <b>F5</b> | F13 | The improvement of the ecosystem services provided by the Tamassos dam reservoir reduces the flooding from the Pedieos river.                                                                                                                                                                                                    | -0.2: weak negative relationship      |
| <b>F6</b> | F11 | The improvement of the ecosystem services of the river and riparian zones improves the aquifer recharge                                                                                                                                                                                                                          | 0.2: weak positive relationship       |
| <b>F6</b> | F13 | The improvement of the ecosystem services of the river and riparian zones reduces the flooding from the Pedieos river.                                                                                                                                                                                                           | -0.2: weak negative relationship      |
| <b>F7</b> | F9  | Better management of rainfed crops creates strong positive effects on the livestock                                                                                                                                                                                                                                              | 0.5: medium positive relationship     |
| <b>F7</b> | F13 | Rainfed crops reduce the flooding from the Pedieos river through the land cover.                                                                                                                                                                                                                                                 | -0.2: weak negative relationship      |
| <b>F8</b> | F6  | Irrigated crops negatively impacts on the ecosystem services of the river and riparian zones since less water flows in the riverbed                                                                                                                                                                                              | -0.2: weak negative relationship      |
| <b>F8</b> | F11 | Irrigated agriculture creates very strong negative impacts on the groundwater resources both in quantitative and qualitative terms                                                                                                                                                                                               | -1: very strong negative relationship |
| <b>F8</b> | F13 | Irrigated crops reduce the flooding from the Pedieos river through the land cover.                                                                                                                                                                                                                                               | -0.2: weak negative relationship      |
| <b>F9</b> | F4  | The expansion of livestock negatively impacts on the ecosystem services provided by the forests                                                                                                                                                                                                                                  | -0.2: weak negative relationship      |
| <b>F9</b> | F5  | The expansion of livestock negatively impacts on the ecosystem services provided by the Tamassos dam reservoir                                                                                                                                                                                                                   | -0.2: weak negative relationship      |

|            |     |                                                                                                                                                                                           |                                      |
|------------|-----|-------------------------------------------------------------------------------------------------------------------------------------------------------------------------------------------|--------------------------------------|
| <b>F9</b>  | F6  | The expansion of livestock negatively impacts on the ecosystem services provided by the river and riparian zones                                                                          | -0.2: weak negative relationship     |
| <b>F9</b>  | F11 | The expansion of livestock negatively impacts on the qualitative and quantitative status of groundwater.                                                                                  | -0.2: weak negative relationship     |
| <b>F10</b> | F5  | An increase of rural households' water demand reduces the quantities of the surface water.                                                                                                | -0.2: weak negative relationship     |
| <b>F10</b> | F11 | An increase of rural households' water demand strongly reduces the quantities of the groundwater.                                                                                         | -0.5: medium negative relationship   |
| <b>F11</b> | F8  | The improvement of the quantitative and qualitative status of groundwater releases more water for irrigation purposes creating thus very strong positive effects on irrigated agriculture | 1: very strong positive relationship |
| <b>F11</b> | F9  | The improvement of the quantitative and qualitative status of groundwater positively impacts on the livestock                                                                             | 0.2: weak positive relationship      |
| <b>F12</b> | F6  | Urban runoff negatively impacts on the ecosystem services provided by the river and riparian zones                                                                                        | -0.2: weak negative relationship     |
| <b>F12</b> | F13 | Urban runoff strongly increase the flooding from the Pedieos river                                                                                                                        | 1: very strong positive relationship |
| <b>F13</b> | F6  | Flooding from the Pedieos river negatively impacts on the ecosystem services of the river and riparian zones                                                                              | -0.2: weak negative relationship     |
| <b>F13</b> | F12 | Flooding from the Pedieos river strongly increase the urban runoff                                                                                                                        | 1: very strong positive relationship |

## Documentation of the Fuzzy Cognitive Map for the Rmel river basin

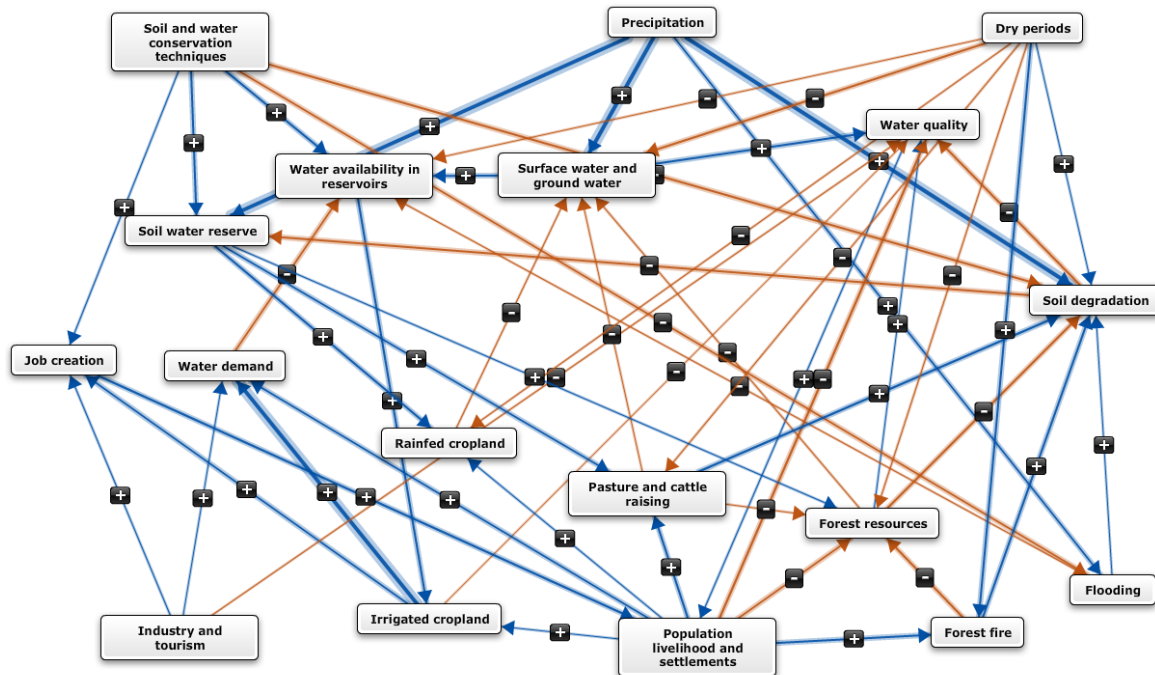

Figure S2: Fuzzy Cognitive Map developed for the Rmel river basin.

Table S4: Definition of the factors for the Rmel river basin

| Number | Name of factor                         | Definition                                                                                           |
|--------|----------------------------------------|------------------------------------------------------------------------------------------------------|
| F1     | Precipitation                          | Irregular and high intensity regime of precipitation                                                 |
| F2     | Surface water and ground water         | Volumes of water in rivers and the level of aquifers.                                                |
| F3     | Soil water reserve                     | Volume of water that is stored in the soil                                                           |
| F4     | Flooding                               | Natural extreme event.                                                                               |
| F5     | Soil degradation                       | Caused by heavy precipitation on bare soils and steep areas.                                         |
| F6     | Water availability in reservoirs       | Volume of water available in dams, hill, lakes, etc.                                                 |
| F7     | Irrigated cropland                     | Irrigated fields that are created downstream after the construction of the dam.                      |
| F8     | Water quality                          | Refers to pollution of rivers and aquifers by industrial zone that is recently created.              |
| F9     | Forest resources                       | Various tree species (productive and protected species).                                             |
| F10    | Water demand                           | Water demand of different sectors (Agriculture, population, industry and tourism).                   |
| F11    | Soil and water conservation techniques | Limited within the catchment, they are located on steep up stream farmlands to collect runoff water. |
| F12    | Job creation                           | Creation of jobs in agricultural and environmental sectors to promote development in the region.     |
| F13    | Forest fire                            | Disaster that can be natural or anthropogenic.                                                       |

|            |                                       |                                                                                                                                        |
|------------|---------------------------------------|----------------------------------------------------------------------------------------------------------------------------------------|
| <b>F14</b> | Industry and tourism                  | Includes different enterprises, factories ,olive presses and thermal stations, etc.                                                    |
| <b>F15</b> | Population livelihood and settlements | Includes all population categories and settlements in different sectors based on promoting new agricultural and environmental projects |
| <b>F16</b> | Pasture and cattle raising            | Developed mainly in Rural communities.                                                                                                 |
| <b>F17</b> | Rainfed cropland                      | Land contains crops that rely on rainfall.                                                                                             |
| <b>F18</b> | Dry periods                           | Succession of dry years.                                                                                                               |

**Table S.5: Documentation of the relationships for the Rmel river basin**

| <b>From</b>                                | <b>To</b>                           | <b>Justification</b>                                                                                                                                                      |
|--------------------------------------------|-------------------------------------|---------------------------------------------------------------------------------------------------------------------------------------------------------------------------|
| <b>F1 Precipitation</b>                    | F2 Surface and groundwater          | Strong positive relation because a fraction of precipitation reaches rivers directly as runoff or, indirectly, through deep drainage to groundwater and stream base flow. |
| <b>F1 Precipitation</b>                    | F3 Soil water reserve               | Strong positive relation because a fraction of rainfall infiltrates into the soil and is available for plants.                                                            |
| <b>F1 Precipitation</b>                    | F4 Flooding                         | Medium positive relation as flooding occurs occasionally                                                                                                                  |
| <b>F1 Precipitation</b>                    | F5 Soil degradation                 | Strong positive relation because precipitation is the main reason of the soil degradation in the Rmel watershed                                                           |
| <b>F2 Surface water and ground water</b>   | F5 water availability in reservoirs | Medium positive relation because the water in reservoirs does not come only from surface water and groundwater ,it comes from precipitations also                         |
| <b>F2 Surface water and ground water</b>   | F8 water quality                    | Medium positive relation displays that surface water can affect the quality of water                                                                                      |
| <b>F3 Soil water reserve</b>               | F9 Forest resources                 | Low positive relation because the soil water reserve could maintain the growth of forests                                                                                 |
| <b>F3 Soil water reserve</b>               | F16 Pasture and cattle raising      | Medium positive relation because the more we have water the more grass we have for the cattle                                                                             |
| <b>F3 Soil water reserve</b>               | F17 Rainfed cropland                | Medium positive relation because rainfed croplands depend on water                                                                                                        |
| <b>F4 Flooding</b>                         | F6 Water availability in reservoirs | Low negative relation due to the damage that could be done by flooding                                                                                                    |
| <b>F4 Flooding</b>                         | F5 Soil degradation                 | Low positive relation because flooding may cause runoff that leads to the soil degradation                                                                                |
| <b>F5 Soil degradation</b>                 | F3 Soil water reserve               | Medium negative relation because when soil is degraded its retention capacity decreases                                                                                   |
| <b>F5 Soil degradation</b>                 | F8 water quality                    | Medium negative relation because when soil is degraded the salinity increases and affects water quality                                                                   |
| <b>F6 Water availability in reservoirs</b> | F7 Irrigated cropland               | Medium positive relation because when we have water in reservoirs the irrigated cropland will not depend only on rainy seasons                                            |
| <b>F7 Irrigated cropland</b>               | F8 water quality                    | Low negative relation because of the use of fertilizers and pesticides                                                                                                    |
| <b>F7 Irrigated cropland</b>               | F1 Water demand                     | Strong positive relation because of the water-consuming crops (watermelon, tomatoes...)                                                                                   |

|                                                   |                                           |                                                                                                                                                                                                |
|---------------------------------------------------|-------------------------------------------|------------------------------------------------------------------------------------------------------------------------------------------------------------------------------------------------|
| <b>F7 Irrigated cropland</b>                      | F12 Job creation                          | Medium positive relation because developed agriculture attracting somehow employers                                                                                                            |
| <b>F8 Water quality</b>                           | F15 population livelihood and settlements | Low positive relation because in somehow when the water quality is good it might improve the population livelihood and hence it would have a positive impact on population-related sectors     |
| <b>F9 Forest resources</b>                        | F2 surface water and ground water         | Low negative relation because in some way with more forest we have more trees consuming water from aquifers                                                                                    |
| <b>F9 Forest resources</b>                        | F5 Soil degradation                       | Medium negative relation because forest resources contribute in protecting the soil                                                                                                            |
| <b>F9 Forest resources</b>                        | F8 water quality                          | Low positive relation because forest protect soil from degradation and eventually the water quality, moreover the growth of forest does not require fertilizers so the water quality is intact |
| <b>F10 Water demand</b>                           | F5 water availability in reservoirs       | Medium negative relation because when the water demand goes up the water availability decreases especially in summer                                                                           |
| <b>F11 soil and water conservation techniques</b> | F3 soil water reserve                     | Medium positive relation because these techniques would decrease the runoff so the soil water reserve is preserved                                                                             |
| <b>F11 soil and water conservation techniques</b> | F4 Flooding                               | Medium negative relation because these techniques can lessen the impact of flooding                                                                                                            |
| <b>F11 soil and water conservation techniques</b> | F5 Soil degradation                       | Medium negative relation because these techniques can lessen the impact of the rainfall and runoff that cause the soil degradation                                                             |
| <b>F11 soil and water conservation techniques</b> | F5 water availability in reservoirs       | Medium positive relation because these techniques provide the protections of reservoirs and do not allow sediment storage in reservoirs. They keep the storage capacity of the reservoirs      |
| <b>F11 soil and water conservation techniques</b> | F12 Job creation                          | Low positive relation because these techniques require workers and funding, which is lacking currently                                                                                         |
| <b>F12 Job creation</b>                           | F15 population livelihood and settlements | Medium positive relation because more jobs may attract more people                                                                                                                             |
| <b>F13 Forest fire</b>                            | F5 Soil degradation                       | Medium positive relation because fire will damage plants and trees so it will accelerate the soil degradation                                                                                  |
| <b>F13 Forest fire</b>                            | F9 Forest resources                       | Medium negative relation for the fact that more fires destroy forest resources                                                                                                                 |
| <b>F14 Industry and tourism</b>                   | F8 water quality                          | Low negative relation because of the waste water of factories, olive presses...                                                                                                                |
| <b>F14 Industry and tourism</b>                   | F10 Water demand                          | Low positive relation because growing industry and tourism need more water                                                                                                                     |
| <b>F14 Industry and tourism</b>                   | F12 Job creation                          | Low positive relation because when the industrial and touristic sectors grow, they create jobs                                                                                                 |

|                                                  |                                     |                                                                                                                                                                                                                                                                                                                |
|--------------------------------------------------|-------------------------------------|----------------------------------------------------------------------------------------------------------------------------------------------------------------------------------------------------------------------------------------------------------------------------------------------------------------|
| <b>F15 population livelihood and settlements</b> | F7 Irrigated cropland               | Low positive relation. higher population would require more food production                                                                                                                                                                                                                                    |
| <b>F15 population livelihood and settlements</b> | F8 water quality                    | Medium negative relation because the growth of population livelihood affect the water quality                                                                                                                                                                                                                  |
| <b>F15 population livelihood and settlements</b> | F9 Forest resources                 | Medium negative relation because of the growth of urbanization.                                                                                                                                                                                                                                                |
| <b>F15 population livelihood and settlements</b> | F10 Water demand                    | Medium positive relation because when population grows, it needs more water                                                                                                                                                                                                                                    |
| <b>F15 population livelihood and settlements</b> | F13 Forest fire                     | Medium positive relation and this is due to the lack of awareness to the importance of forest resources                                                                                                                                                                                                        |
| <b>F15 population livelihood and settlements</b> | F16 Pasture and cattle raising      | Low positive relation. This relation is due to the fact that when jobs are created they will target the population livelihood so pasture and cattle raising increases                                                                                                                                          |
| <b>F15 population livelihood and settlements</b> | F17 Rainfed cropland                | Low positive relation. Higher population would require more food production                                                                                                                                                                                                                                    |
| <b>F16 Pasture and cattle raising</b>            | F2 surface water and ground water   | Low negative relation because more cattle means more needs in water                                                                                                                                                                                                                                            |
| <b>F16 Pasture and cattle raising</b>            | F5 Soil degradation                 | Medium positive relation because of the overgrazing and overexploitation of the land                                                                                                                                                                                                                           |
| <b>F16 Pasture and cattle raising</b>            | F9 Forest resources                 | Low negative relation because of the overgrazing                                                                                                                                                                                                                                                               |
| <b>F17 Rainfed cropland</b>                      | F2 surface water and ground water   | Low negative relation because rainfed croplands depend on surface and ground water coming from precipitations                                                                                                                                                                                                  |
| <b>F18 Dry periods</b>                           | F2 surface water and ground water   | Medium negative relation because in dry periods surface water and groundwater are the most important water supply                                                                                                                                                                                              |
| <b>F18 Dry periods</b>                           | F5 Soil degradation                 | Low positive relation because in dry periods vegetation cover will decrease and during autumn period precipitations on bare soils will probably lead to soil loss. The evaporation processes active during dry periods and leads generally to the salinization of the soil surface (bring the salt on surface) |
| <b>F18 Dry periods</b>                           | F5 water availability in reservoirs | Low negative relation because in dry periods there is a frequent use of water from the reservoirs                                                                                                                                                                                                              |
| <b>F18 Dry periods</b>                           | F9 Forest resources                 | Low negative relation because in dry periods forest resources became more fragile                                                                                                                                                                                                                              |
| <b>F18 Dry periods</b>                           | F13 Forest fire                     | Medium positive relation because high temperature can ignite fire                                                                                                                                                                                                                                              |
| <b>F18 Dry periods</b>                           | F16 Pasture and cattle raising      | Low negative relation because in dry periods pasture and cattle raising are affected due to the vegetation shortage                                                                                                                                                                                            |

|                 |                      |                                                                                                              |
|-----------------|----------------------|--------------------------------------------------------------------------------------------------------------|
| F18 Dry periods | F17 Rainfed cropland | Low negative relation because in dry periods rainfed croplands are affected because of lack of precipitation |
|-----------------|----------------------|--------------------------------------------------------------------------------------------------------------|

### Documentation of the Fuzzy Cognitive Map for the Tordera river basin

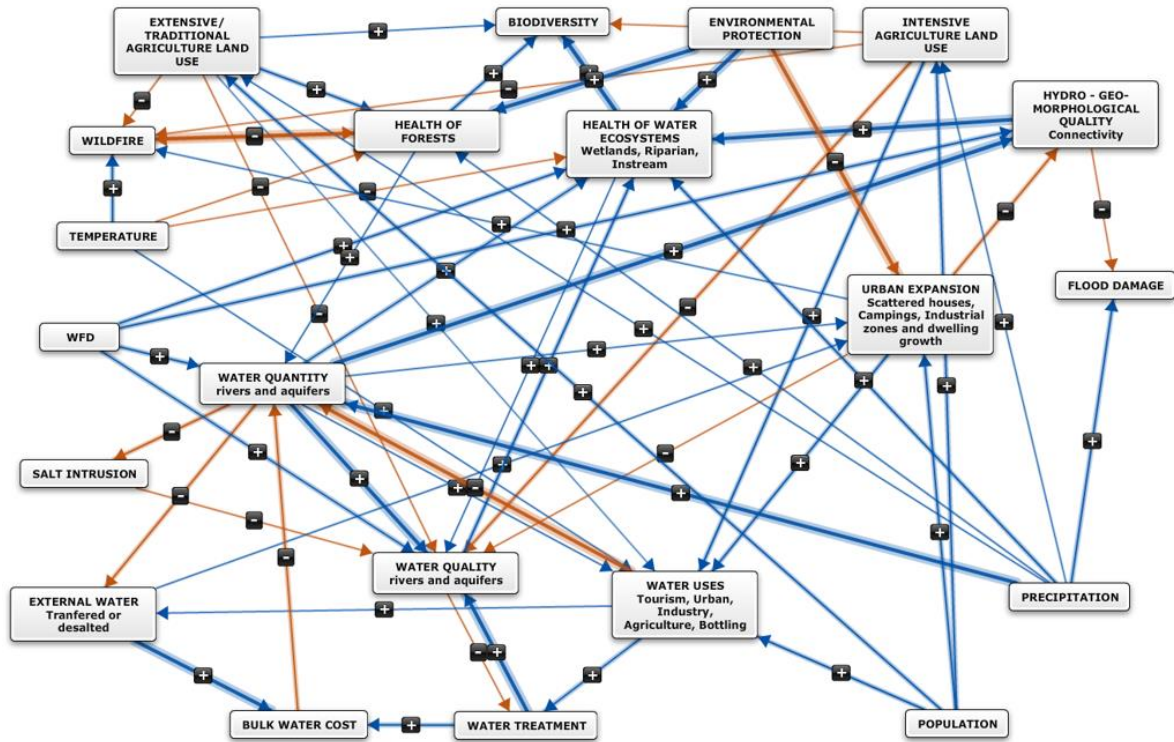

Figure S3: Fuzzy Cognitive Map developed for the Tordera river basin.

Table S6: Definition of the factors for the Tordera river basin

| Number | Factors                                           | Definition                                                                                                                                             |
|--------|---------------------------------------------------|--------------------------------------------------------------------------------------------------------------------------------------------------------|
| F1     | Wildfire                                          | Forest fire                                                                                                                                            |
| F2     | Health of forests                                 | Composition of species, forest structure and functionality.                                                                                            |
| F3     | Extensive/<br>traditional<br>agriculture land use | Refers to enterprises with a low input exploitation model. Factor refers to land use, water use these activities enhance is considered part of the F6  |
| F4     | Biodiversity                                      | Indicates level of biodiversity in all ecosystems                                                                                                      |
| F5     | Water quality                                     | Refers to chemical and biological quality of rivers; chemical quality of aquifers.                                                                     |
| F6     | Water uses                                        | Urban, Tourism, Industry, Agriculture, Bottling are main uses considered.                                                                              |
| F7     | Intensive<br>agriculture land use                 | Refers to enterprises with a high input exploitation model. Factor refers to land use, water use these activities enhance is considered part of the F6 |
| F8     | Temperature                                       | Temperature of the air                                                                                                                                 |
| F9     | Health of water<br>ecosystems                     | Quality of wetlands, riparian, in-stream ecosystems                                                                                                    |

|            |                                   |                                                                                                                                                                                             |
|------------|-----------------------------------|---------------------------------------------------------------------------------------------------------------------------------------------------------------------------------------------|
| <b>F10</b> | Salt intrusion                    | Lowering level of freshwater in aquifers entails intrusion of seawater.                                                                                                                     |
| <b>F11</b> | Water quantity                    | Refers to the volumes of water flowing in rivers, the level of aquifers and feed in ratio of all related water bodies.                                                                      |
| <b>F12</b> | Hydro - geo-morphological quality | Broad concept, Includes: river space, all forms of connectivity and delta/coastline morphology. This factor includes Sediment flows (mobilization of sand, gravel and all solid components) |
| <b>F13</b> | Urban expansion                   | Scattered houses, Camping, Industrial zones and dwelling growth                                                                                                                             |
| <b>F14</b> | External water                    | Refers to all input from no natural sources of the basin: Transferred from other basins or produced through desalinization or reclaiming plants.                                            |
| <b>F15</b> | Bulk water cost                   | Refers to the real costs to obtain bulk water                                                                                                                                               |
| <b>F16</b> | Water treatment                   | The presence of wastewater treatment facilities, as well as purification plants.                                                                                                            |
| <b>F17</b> | Flood damage                      | Refers to the impact on people and infrastructure of floods.                                                                                                                                |
| <b>F18</b> | Precipitation                     | Precipitation regime                                                                                                                                                                        |
| <b>F19</b> | Population                        | Refers to both resident and tourist population                                                                                                                                              |
| <b>F20</b> | WFD                               | Refers to those management and policy measures implemented to meet WFD objectives                                                                                                           |
| <b>F21</b> | Environmental protection          | Refers to all legislation aiming at environmental protection: N2K, PEIN, Parks, etc.                                                                                                        |

**Table S7: Documentation of the relationships for the Tordera river basin**

| <b>Relationship</b>                               | <b>Explanation</b>                                                                                                                                                                                                                       |
|---------------------------------------------------|------------------------------------------------------------------------------------------------------------------------------------------------------------------------------------------------------------------------------------------|
| <b>F1 Wildfire to F2 Health of Forests</b>        | Strong negative relation because where forest fires occur, it destroys the whole ecosystem.                                                                                                                                              |
| <b>F2 Health of Forests to F1 Wildfire</b>        | Medium negative relation because the structure of forests determinate the conditions for wildfires to occur.                                                                                                                             |
| <b>F2 Health of Forests to F4 Biodiversity</b>    | Medium positive relation because forest ecological quality and functionality are crucial for biodiversity to develop.                                                                                                                    |
| <b>F2 Health of Forests to F11 Water Quantity</b> | Light negative relation because the level of water consumption of the forest evapotranspiration is influenced by its structure and composition.                                                                                          |
| <b>F3 Ext. Agric. To F1 Wildfire</b>              | Light negative relation because extensive agriculture increases quality of land use mosaic and reduces fuel load in forests through livestock grazing.                                                                                   |
| <b>F3 Ext. Agric. to F2 Health of Forests</b>     | Medium positive relation because extensive agriculture helps reducing understory vegetation through livestock grazing.                                                                                                                   |
| <b>F3 Ext. Agric. to F4 Biodiversity</b>          | Light positive relation because traditional agricultural practices generate specific ecosystems and may function as ecological niche and corridor.                                                                                       |
| <b>F3 Ext. Agric. to F5 Water Quality</b>         | Light negative relation because extensive agriculture uses little pesticides and fertilizers (niche products), uses more adapted crops, has better soil quality and may allow riparian / wetlands to co-exist in plots (bio-depuration). |
| <b>F2 Health of Ecosystems to F1 Wildfire</b>     | Medium negative relation because healthy ecosystems the probability of wildfires occurrence, although this is not the only factor involved in prevention conditions.                                                                     |

|                                                          |                                                                                                                                                                                                                                                         |
|----------------------------------------------------------|---------------------------------------------------------------------------------------------------------------------------------------------------------------------------------------------------------------------------------------------------------|
| <b>F2 Health Of Ecosystems to F4 Biodiversity</b>        | Strong positive relation, as this factor is the main condition for biodiversity to develop.                                                                                                                                                             |
| <b>F2 Health Of Ecosystems to F5 Water Quality</b>       | Medium positive relation because healthy ecosystems related to water bodies have a strong depurative function until a certain degree of pollution.                                                                                                      |
| <b>F3 Ext. Agric. to F6 Water Uses</b>                   | Light negative relation because extensive agriculture land use is rainfed or supplied by gravity irrigation. The latter consumes much water, but also has very big return rates. In Tordera hydrogeology return rates go directly back to water bodies. |
| <b>F5 Water Quality to F9 Health of Water Ecosystems</b> | Light positive relation because clean water enhances ecosystem health, while pollution may be only partially absorbed by ecosystems.                                                                                                                    |
| <b>F5 Water Quality to F16 Water Treatment</b>           | Light negative relation because purification treatment is less intensive when water quality is higher, but still needed in most cases.                                                                                                                  |
| <b>F6 Water Uses to F11 Water Quantity</b>               | Strong negative relation because Tordera basin suffers strong overexploitation.                                                                                                                                                                         |
| <b>F6 Water Uses to F14 External Water</b>               | Light positive relation because demand is the main impulse for unconventional water production.                                                                                                                                                         |
| <b>F6 Water Uses to F16 Water Treatment</b>              | Medium positive relation because all uses affect water quality and most wastewater should be treated.                                                                                                                                                   |
| <b>F7 Intensive Agr. to F1 Wildfire</b>                  | Light negative relation because intensive agriculture farming clears the land and contributes to land use mosaic, reducing wildfire fuel.                                                                                                               |
| <b>F7 Intensive Agr. to F4 Biodiversity</b>              | Light negative relation because intensive agriculture farm practices strongly degrade biodiversity                                                                                                                                                      |
| <b>F7 Intensive Agr. to F5 Water Quality</b>             | Medium negative relation because intensive farming practices are highly polluting and occupy riparian areas (no buffer strips) increasing direct runoff into rivers                                                                                     |
| <b>F7 Intensive Agr. to F6 Water Uses</b>                | Medium positive relation because intensive agriculture has a strong and consolidated demand, in the lower part of the river.                                                                                                                            |
| <b>F5 Water Quality to F6 Water Uses</b>                 | Light positive relation because water quality is a limiting factor to water uses, due to high treatment costs. Especially relevant aspect in Tordera.                                                                                                   |
| <b>F5 Water Quality to F15 Bulk Water Cost</b>           | Light negative relation (actually could be stronger) because salt intrusion and nitrate pollution in groundwater are very costly processes to be developed for drinkwater production.                                                                   |
| <b>F8 Temperature to F1 Wildfire</b>                     | Medium positive relation because especially in summer, high temperatures generate the conditions for wildfires to occur.                                                                                                                                |
| <b>F8 Temperature to F2 Health of Forests</b>            | Light negative relation because forest ecosystems suffer from high temperature, even though some species are adapted.                                                                                                                                   |
| <b>F8 Temperature to F6 Water Uses</b>                   | Light positive relation because agriculture and urban (tourism) water demands increase with high temperature, but this is not valid for bottling plants and industry.                                                                                   |
| <b>F8 Temperature to F9 health of water Ecosystems</b>   | Light negative relation because temperature increases evaporation and temperature of the water, but the effect on water ecosystems depends on many factors.                                                                                             |
| <b>F9 Health of Water Ecosystems to F4 Biodiversity</b>  | Strong positive relation because water ecosystems highly contribute to quality of biodiversity.                                                                                                                                                         |

|                                                            |                                                                                                                                                                                                                                       |
|------------------------------------------------------------|---------------------------------------------------------------------------------------------------------------------------------------------------------------------------------------------------------------------------------------|
| <b>F9 Health of Water Ecosystems to F5 Water Quality</b>   | Light positive relation because the capacity of water depuration by water ecosystems is constraint to many environmental conditions.                                                                                                  |
| <b>F10 Salt intrusion to F5 Water Quality</b>              | Light negative relation because the phenomenon is limited to the lower part of the basin. In those areas this is a crucial factor and relationship is strong.                                                                         |
| <b>F11 Water Quantity to F5 Water Quality</b>              | Strong positive relation because quantity determinates water quality at all levels.                                                                                                                                                   |
| <b>F11 Water Quantity to F6 Water Uses</b>                 | Light positive relation because water quantity is a limiting factor to all uses, but the availability of external water may reduce this weight.                                                                                       |
| <b>F11 Water Quantity to F9 Health of Water Ecosystems</b> | Medium positive relation because adequate flow regime is a precondition to ecosystems to exist.                                                                                                                                       |
| <b>F11 Water Quantity to F10 Salt intrusion</b>            | Medium negative relation because the phenomenon is limited to the lower part of the basin. In those areas this is a crucial factor and relationship is strong.                                                                        |
| <b>F11 Water Quantity to F14 External Water</b>            | Medium negative relation because Tordera is an overexploited Basin and external water is partially compensating the lack available flows for some uses.                                                                               |
| <b>F12 Hydro-Geo-m. to F9 Health of Water Ecosystems</b>   | Strong positive relation because river morphology is crucial to enhance habitats for the ecosystem to develop                                                                                                                         |
| <b>F12 Hydro-Geo-m. to F17 Flood Damage</b>                | Light negative relation as flood damage to dwellings and people is directly proportional to the quality of river morphology.                                                                                                          |
| <b>F13 Urban Expansion to F1 Wildfire</b>                  | Light positive relation because the more people living in scattered houses or touristic dwellings, the more the risk of wildfire increases                                                                                            |
| <b>F13 Urban Expansion to F5 Water Quality</b>             | Light negative relation because the expansion of dwellings also implies more wastewater pollution and most small settlements do not have any treatment facilities.                                                                    |
| <b>F13 Urban Expansion to F6 Water Uses</b>                | Medium positive relation because increased settlements entail increased urban water use.                                                                                                                                              |
| <b>F13 Urban Expansion to F12 Hydro-Geo-m.</b>             | Medium negative relation because much urban expansion - especially industrial areas in the middle part of the basin - are positioned in the river space.                                                                              |
| <b>F14 External Water to F13 Urban expansion</b>           | Light positive relation because when there is no water availability for new demands, unconventional water resources are produced.                                                                                                     |
| <b>F14 External Water to F15 Bulk Water Cost</b>           | Strong positive relationship, because water desalting and reclaiming plants are costly investments and entail energy consumption.                                                                                                     |
| <b>F15 Bulk Water Cost to F11 Water Quantity</b>           | Strong negative relation, as direct catchments from water bodies are cheaper than external water, when bulk water price is high, water service entities will increase direct catchments, reducing the water quantity in water bodies. |
| <b>F16 Water Treatment to F5 Water Quality</b>             | Strong positive relation as the presence of water treatment facilities are the main precondition for enhancing water quality.                                                                                                         |

|                                                                      |                                                                                                                                                                                                              |
|----------------------------------------------------------------------|--------------------------------------------------------------------------------------------------------------------------------------------------------------------------------------------------------------|
| <b>F16 Water Treatment to F 15 Bulk Water Cost</b>                   | Medium positive relation because water treatment facilities are costly investments and entail energy consumption.                                                                                            |
| <b>F 18 Precipitation to F2 Heath of Forests</b>                     | Light positive relation because Mediterranean forests ecosystems are sensible to variations in precipitation                                                                                                 |
| <b>F 18 Precipitation to F3 Ext. Agric.</b>                          | Light positive relation because extensive agriculture depends a lot on precipitation but also has more resilience due to the use of native species.                                                          |
| <b>F 18 Precipitation to F7 Intensive Agr.</b>                       | Light positive relation because intensive agricultural practices depend on precipitation, but integrate natural resources with irrigation from regulated water bodies.                                       |
| <b>F 18 Precipitation to F9 Health of Water Ecosystems</b>           | Medium positive relation because water related ecosystems are highly dependent on precipitation, especially those in wetlands and smaller streams.                                                           |
| <b>F 18 Precipitation to F11 Water Quantity</b>                      | Strong positive relation because water flows in all water bodies depends on precipitation.                                                                                                                   |
| <b>F 18 Precipitation to F17 Flood Damage</b>                        | Medium positive relation because flood intensity is highly related to the intensity of precipitation, although the damage largely depends on the presence of infrastructure and people in the flooding zone. |
| <b>F19 Population to F3 Ext. Agric.</b>                              | Medium positive relation because extensive agriculture engages a high number of people and food produced is mostly consumed locally.                                                                         |
| <b>F19 Population to F6 Water Uses</b>                               | Medium positive relation because this is the direct pressure on urban demand, the most relevant demand in the Basin.                                                                                         |
| <b>F19 Population to F7 Intensive Agr.</b>                           | Medium positive relation because in the lower part of the basin intensive horticulture is the main agriculture activity and engages many people.                                                             |
| <b>F19 Population to F13 Urban Expansion</b>                         | Medium positive relations because touristic facilities are growing in the basin and so do interregional transport facilities.                                                                                |
| <b>F20 WFD to F5 Water Quality</b>                                   | Medium positive relation because this legal framework has many actions orientated to directly increase water quality, but it is only partially implemented.                                                  |
| <b>F20 WFD to F9 Health of Water Ecosystems</b>                      | Medium positive relation because this legal framework has many actions orientated to directly increase water related ecosystems, but it is only partially implemented.                                       |
| <b>F20 WFD to F11 Water Quantity</b>                                 | Medium positive relation because this legal framework has many actions orientated to directly increase water flows in rivers and aquifers, but it is only partially implemented.                             |
| <b>F20 WFD to F12 Hydro-Geo-m.</b>                                   | Medium positive relation because this legal framework has many actions orientated to directly increase Hydro-geo-morphological quality, but it is only partially implemented.                                |
| <b>F21 Environmental protection to F2 Heath of Forests</b>           | Strong positive weight because in Tordera most healthy forests are those with more protection strategies.                                                                                                    |
| <b>F21 Environmental protection to F9 Health of Water Ecosystems</b> | Strong positive weight because environmental protection strategies are crucial to avoid complete destruction of Tordera water bodies.                                                                        |
| <b>F21 Environmental protection to F13 Urban Expansion</b>           | Strong negative weight because constructions are prohibited or limited in environmentally protected areas.                                                                                                   |

## Documentation of the Fuzzy Cognitive Map for the Vipava river basin

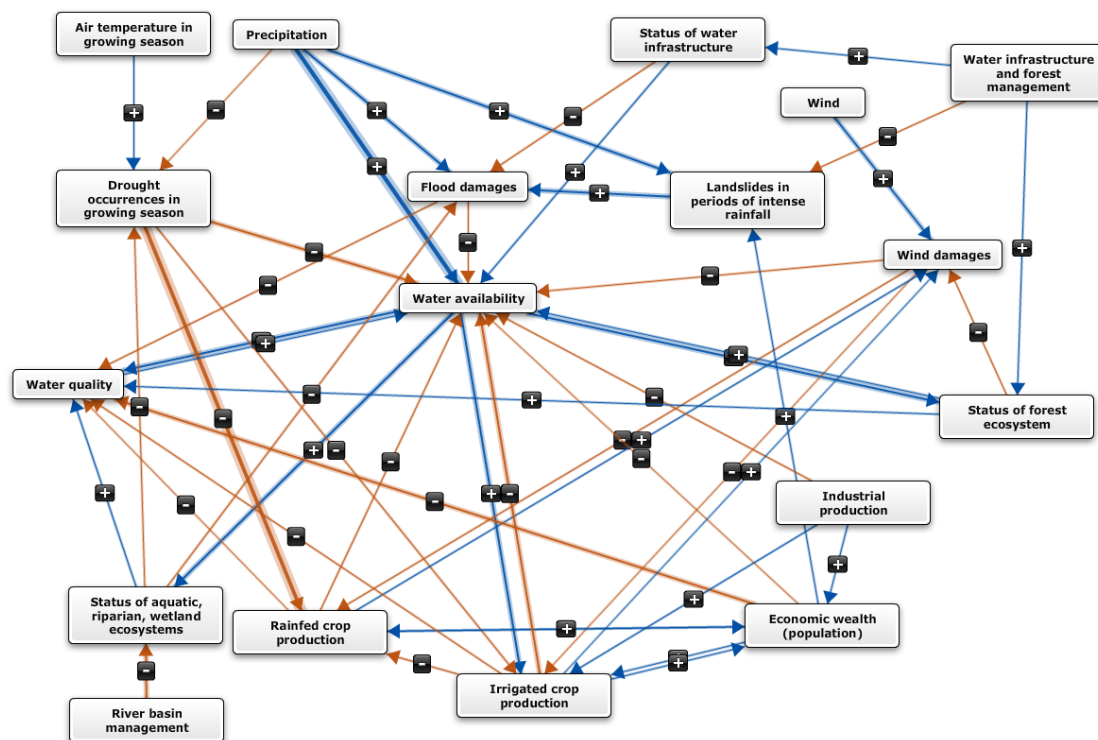

Figure S4: Fuzzy Cognitive Map developed for the Vipava river basin.

Table S8: Definition of the factors for the Vipava river basin

| Number | Name of factor                             | Definition                                                                                                                                          |
|--------|--------------------------------------------|-----------------------------------------------------------------------------------------------------------------------------------------------------|
| F1     | Precipitation                              | Annual average precipitation.                                                                                                                       |
| F2     | Air temperature in growing season          | Growing season - the period of time in a given year when the climate is prime for both indigenous and cultivated plants experience the most growth. |
| F3     | Wind                                       | Strong bora wind, cold and gusty north-eastern wind, especially in the cold half of the year (October to March).                                    |
| F4     | Water infrastructure and forest management | Management of water infrastructure of aquatic and riparian area, forests.                                                                           |
| F5     | Drought occurrences in growing season      | Droughts that occur in growing season. Meaning meteorological and hydrological droughts.                                                            |
| F6     | Flood damages                              | Damages caused by floods along the Vipava river and its tributaries.                                                                                |
| F7     | Landslides in periods of intense rainfall  | Landslides on the slope of the Vipava valley – mostly associated with geological and morphological conditions.                                      |
| F8     | Wind damages                               | Damages caused by strong bora wind.                                                                                                                 |
| F9     | Status of water infrastructure             | Physical condition of existing water infrastructure – e.g. accumulation with dam (Vogršček), river embankments, check dams (storage of sediments)   |

|            |                                                 |                                                                                                                                                                                                                          |
|------------|-------------------------------------------------|--------------------------------------------------------------------------------------------------------------------------------------------------------------------------------------------------------------------------|
| <b>F10</b> | Status of forest ecosystems                     | Ecological condition of forest ecosystems.                                                                                                                                                                               |
| <b>F11</b> | Status of aquatic, riparian, wetland ecosystems | Ecological, Hydrological, Morphological, Biological status of aquatic, riparian and wetland ecosystems                                                                                                                   |
| <b>F12</b> | Water availability                              | The availability of the water at its source (river, spring, accumulation) for all users – ecosystems and needs arising from human activities.                                                                            |
| <b>F13</b> | Water quality                                   | Physical-chemical parameters of water.                                                                                                                                                                                   |
| <b>F14</b> | River basin management                          | Management of surface waters and groundwater; e.g. the status, program of measures, maintenance and investment work planned and carried by concessionaire with confirmation of ministry responsible for the environment. |
| <b>F15</b> | Rainfed crop production                         | Crops that are not irrigated and they are dependent only from rain.                                                                                                                                                      |
| <b>F16</b> | Irrigated crop production                       | Crops that are irrigated (also in closed spaces – glasshouses).                                                                                                                                                          |
| <b>F17</b> | Economic wealth (population)                    | Including population and settlements development in the RB.                                                                                                                                                              |
| <b>F18</b> | Industrial production                           | Mostly food processing and textile industry.                                                                                                                                                                             |

**Table S9: Documentation of the relationships for the Vipava river basin**

| <b>From</b> | <b>To</b>  | <b>Justification</b>                                                                                                                                                                                                                                                             | <b>Strength of the relationship</b> |
|-------------|------------|----------------------------------------------------------------------------------------------------------------------------------------------------------------------------------------------------------------------------------------------------------------------------------|-------------------------------------|
| <b>F1</b>   | <b>F5</b>  | more precipitation mean less drought occurrences                                                                                                                                                                                                                                 | 1-: weak negative relationship      |
| <b>F1</b>   | <b>F6</b>  | longer periods of rainfall or even shorter periods of heavy rainfall cause flood events that cause damages mostly to infrastructure                                                                                                                                              | 2+: medium positive relationship    |
| <b>F1</b>   | <b>F7</b>  | longer periods of rainfall or even shorter periods of heavy rainfall can trigger landslides; in Vipava RB it has been observed that most landslides are triggered in periods of heavy rainfall, due to impacts of water on the geological structure and formation of the terrain | 2+: medium positive relationship    |
| <b>F1</b>   | <b>F12</b> | more precipitation mean more water available in streams, soil and groundwater; for ecosystems (aquatic, riparian, wetland and forest) and water users (agriculture, households, industry)                                                                                        | 3+: strong positive relationship    |
| <b>F2</b>   | <b>F5</b>  | if air temperature (average annual or monthly) in growing season is getting higher, more droughts occur (weak relationship as droughts are not affected just by the air temperature, there are other factors like changes in precipitation patterns – temporal, spatial)         | 1+: weak positive relationship      |
| <b>F3</b>   | <b>F8</b>  | strong Bora wind (mostly from October to March) cause wind damages, mostly to infrastructure and vegetation, it does not affect the whole basin                                                                                                                                  | 2+: medium positive relationship    |

|           |            |                                                                                                                                                                                                                                                                                                                                         |                                                                                                                                                                                                                                                                                                                                                                                                                                  |
|-----------|------------|-----------------------------------------------------------------------------------------------------------------------------------------------------------------------------------------------------------------------------------------------------------------------------------------------------------------------------------------|----------------------------------------------------------------------------------------------------------------------------------------------------------------------------------------------------------------------------------------------------------------------------------------------------------------------------------------------------------------------------------------------------------------------------------|
| <b>F4</b> | <b>F7</b>  | current management of water infrastructure is present in the basin, but is not efficient enough, not optimal drainage and maintenance of existing water infrastructure. Still management of water infrastructure is present (weak negative relationship) with the objective to decrease landslides                                      | 1-: weak negative relationship                                                                                                                                                                                                                                                                                                                                                                                                   |
| <b>F4</b> | <b>F9</b>  | current management of water infrastructure is present in the basin, but is not efficient enough, so weak positive relationship is defined as status of water infrastructure is not optimal; only important (most needed) intervention works are done and less maintenance works are carried out                                         | 1+: weak positive relationship; example for water reservoir Vogršček – leakage on the dam - intervention works were carried out but due to lack of funding only 1 <sup>st</sup> phase was carried out; water infrastructure on torrents are in poor state not serving its purpose, etc.                                                                                                                                          |
| <b>F4</b> | <b>F10</b> | forest management is present in the basin and is positively affecting status of forest ecosystem, as most of the forest is in the hinterlands of the basin (sparsely populated) and only present in small parts of the valley where established protected areas of forest along Vipava river; weak positive relationship was determined | 1+: weak positive relationship; (Forest management service - units Tolmin and Ajdovščina)                                                                                                                                                                                                                                                                                                                                        |
| <b>F5</b> | <b>F12</b> | when droughts occur in growing season there is less water available for ecosystems and their services and for water users (agriculture sector, urban users)                                                                                                                                                                             | 2-: medium negative relationship                                                                                                                                                                                                                                                                                                                                                                                                 |
| <b>F5</b> | <b>F15</b> | increased frequency and intensity of droughts in growing season (mostly crop-growing periods) reduces the rainfed crop production (smaller or loss of income) - droughts can harm crops and reduce yields, water demand of crops is difficult to meet as water supplies are reduced                                                     | 3-: strong negative relationship; SH in 1st WS indicated, that droughts pose a bigger problem for agriculture in the upper part of the RB. In the period from April to September major part of the Vipava valley is endangered or much endangered by drought. ( <a href="http://geo.ff.uni-lj.si/pisnadela/pdfs/zakse_m_201407_jus_znidarsic.pdf">http://geo.ff.uni-lj.si/pisnadela/pdfs/zakse_m_201407_jus_znidarsic.pdf</a> ). |
| <b>F5</b> | <b>F16</b> | increased frequency and intensity of droughts in growing season (mostly crop-growing periods) reduces the irrigated crop production (smaller or loss of income) - droughts can harm crops and reduce yields, water demand of crops is difficult to meet as water supplies are reduced                                                   | 1-: weak negative relationship; only a small part of the agricultural land is being irrigated from water reservoir Vogršček (lower part of the basin) and Vipava                                                                                                                                                                                                                                                                 |

|           |            |                                                                                                                                                                                                                                                                                                                                                                                                                            |                                                                                                                                                                                                    |
|-----------|------------|----------------------------------------------------------------------------------------------------------------------------------------------------------------------------------------------------------------------------------------------------------------------------------------------------------------------------------------------------------------------------------------------------------------------------|----------------------------------------------------------------------------------------------------------------------------------------------------------------------------------------------------|
|           |            |                                                                                                                                                                                                                                                                                                                                                                                                                            | river (upper part of the basin) (irrigation needs in the Vipava Valley are greater than the available water quantities and other water sources beside water reservoir Vogršček would be needed)    |
| <b>F6</b> | <b>F12</b> | floods cause damages to water supply systems (power failure – problems in water purifying plants, after heavy rainfall water in karst spring becomes turbid and it needs to be cleaned for further use) and so less water is available for its users                                                                                                                                                                       | 1-: weak negative relationship                                                                                                                                                                     |
| <b>F6</b> | <b>F13</b> | floods cause damages to water supply systems (power failure – problems in water purifying plants, after heavy rainfall water in karst spring becomes turbid and it need to be cleaned for further use) and so quality of drinking water deteriorates, also surface water becomes turbid, carrying potential pollutants downstream – surface water quality also deteriorates                                                | 1-: weak negative relationship                                                                                                                                                                     |
| <b>F7</b> | <b>F6</b>  | more landslides trigger in periods of intense rainfall, more damages caused by floods occur; when landslides trigger they move large amounts of sediments, which not only stay on slopes, but also reach the fluvial network. Under catastrophic conditions, land sliding may lead to torrential outbursts, debris flows or dam-break waves after a dam-breach of natural dams. As a result, floods of larger scope occur. | 2+: medium positive relationship; landslides occur on specific places of the basin, where the terrain is becoming more steep (hillslopes)                                                          |
| <b>F8</b> | <b>F12</b> | strong bora wind damages infrastructure and causes power failure - drinking water cannot be transported to some settlements, also purifying plant for drinking water cannot not work                                                                                                                                                                                                                                       | 1-: weak negative relationship, temporally and spatially limited impact                                                                                                                            |
| <b>F8</b> | <b>F15</b> | strong bora wind causes damages in agriculture mostly through wind erosion - removal of top soil, additionally drying soil and causing damages to the crops (damages to leaves); the result is lower crop production                                                                                                                                                                                                       | 1-: weak negative relationship, spatially limited impact meaning where planted wind barriers, this effects are not so strong, and where strong bora wind prevails, permanent grassland are present |
| <b>F8</b> | <b>F16</b> | strong bora wind causes damages in agriculture mostly through wind erosion - removal of top soil, additionally drying soil and causing damages to the crops (damages to leaves); the result is lower crop production                                                                                                                                                                                                       | 1-: weak negative relationship, spatially limited impact, where irrigation prevails, wind is not so strong and causes less damages; the expansion of irrigation                                    |

|            |            |                                                                                                                                                                                                                                                                                                                                    |                                                                                                                                                                                                                                                                              |
|------------|------------|------------------------------------------------------------------------------------------------------------------------------------------------------------------------------------------------------------------------------------------------------------------------------------------------------------------------------------|------------------------------------------------------------------------------------------------------------------------------------------------------------------------------------------------------------------------------------------------------------------------------|
|            |            |                                                                                                                                                                                                                                                                                                                                    | crop production in greenhouses is also limited                                                                                                                                                                                                                               |
| <b>F9</b>  | <b>F6</b>  | if status of infrastructure is good, floods cause less damage                                                                                                                                                                                                                                                                      | 1-: weak negative relationship; spatially limited impact, e.g. water reservoir Vogršček also provides flood safety downstream, but due to leakage of the dam and not finished intervention works, lower water level is maintained by higher discharge of water into Vogršček |
| <b>F9</b>  | <b>F12</b> | if status of water infrastructure, where present and intended for water use (e.g. irrigation system) is in good condition, working properly, more water is available for ecosystems and sectors (agriculture)                                                                                                                      | 1+: weak positive relationship; spatially limited impact, some water infrastructure is present but not in good condition to fully provide water available in the basin                                                                                                       |
| <b>F10</b> | <b>F8</b>  | when forest is in good condition, there are less damages caused by strong bora wind                                                                                                                                                                                                                                                | 1-: weak negative relationship; weak relationship is due to low percent of forest in the form of wind barriers (wind breaks) in the valley                                                                                                                                   |
| <b>F10</b> | <b>F12</b> | the main catchment area of the Vipava river and its tributaries are plateaus in the north, north-east side covered with forest, the status of forest ecosystem positively affects water availability in the flat part of the basin                                                                                                 | 1+: weak positive relationship                                                                                                                                                                                                                                               |
| <b>F10</b> | <b>F13</b> | if the forest ecosystems is in better status, water is better quality - forests impact positively on quality of surface and ground water through minimizing soil erosion on site, thus reducing sediment in water bodies (wetlands, ponds and lakes, streams and rivers), and through trapping or filtering other water pollutants | 1+: weak positive relationship; in the hinterland of the basin forests prevail, this area is also sparsely populated; good chemical status of groundwater and moderate status of surface waters                                                                              |
| <b>F11</b> | <b>F5</b>  | with better status of aquatic, riparian, wetland ecosystems more water is retained and not drained away (better retention function, infiltration of water in the ground) and so less hydrological drought occur                                                                                                                    | 2-: medium negative relationship                                                                                                                                                                                                                                             |
| <b>F11</b> | <b>F6</b>  | with better status of aquatic, riparian, wetland ecosystems flood cause less damages, ecosystems services slow down the flow velocity – like for                                                                                                                                                                                   | 1-: weak negative relationship; some floodplains and meanders                                                                                                                                                                                                                |

|            |     |                                                                                                                                                                                  |                                                                                                                                                                                                                                                                                                                                                         |
|------------|-----|----------------------------------------------------------------------------------------------------------------------------------------------------------------------------------|---------------------------------------------------------------------------------------------------------------------------------------------------------------------------------------------------------------------------------------------------------------------------------------------------------------------------------------------------------|
|            |     | example meanders and floodplains connected to the river                                                                                                                          | are present in the lower part of the basin, and are in a function of slowing down the flow velocity, but due to cannot alone reduce the extend of floods due to regulations of the watercourses in the upper part on the basin (more rapid water runoff from the basin, increased flow velocity, decreased retention function of the riverbed and soil) |
| <b>F11</b> | F13 | with better status of aquatic, riparian, wetland ecosystems better self-cleansing capability of the aquatic environment (improvement in water quality through reduced nutrients) | 1+: weak positive relationship; weak relationship due to moderate ecological status of surface water                                                                                                                                                                                                                                                    |
| <b>F12</b> | F10 | water available in streams, soil and groundwater, satisfies basic environmental needs and if more water is available, forest ecosystem is in better state                        | 2+: medium positive relationship                                                                                                                                                                                                                                                                                                                        |
| <b>F12</b> | F11 | water available in streams, soil and groundwater, satisfies basic environmental needs and if more water is available, aquatic, riparian, wetland ecosystems are in better state  | 2+: medium positive relationship                                                                                                                                                                                                                                                                                                                        |
| <b>F12</b> | F13 | when there is more water in watercourses and groundwater, water quality is of better quality mostly due to dilution of (potential) pollutants                                    | 2+: medium positive relationship; in the case of where net water quantities increase by moderate amounts, and surface water quality will generally improve as streams fill and dilute their pollutants                                                                                                                                                  |
| <b>F12</b> | F16 | when more water is available for irrigation, agriculture production is higher                                                                                                    | 2+: medium positive relationship; spatially limited impact                                                                                                                                                                                                                                                                                              |
| <b>F13</b> | F12 | if water is of better quality, more water is available for users (drinking water, water for irrigation and industry)                                                             | 1+: weak positive relationship; one of the factor, but not the most important one - for domestic use raw water is being purified (due to nature of Hubelj (and Mrzlek) karst spring, used for drinking water, water is being purified with the help of water purification plant)                                                                        |

|            |     |                                                                                                                                                                                                                                                                                                      |                                                                                                                                                                                                                                                                                                                                                                                                                     |
|------------|-----|------------------------------------------------------------------------------------------------------------------------------------------------------------------------------------------------------------------------------------------------------------------------------------------------------|---------------------------------------------------------------------------------------------------------------------------------------------------------------------------------------------------------------------------------------------------------------------------------------------------------------------------------------------------------------------------------------------------------------------|
| <b>F14</b> | F11 | due to past regulations of watercourses and also due to improper intervention works on watercourses, aquatic, riparian and wetland ecosystems are not achieving e.g. good status according to Water framework Directive and natural habitats and habitats of species according to Habitats Directive | 2-: medium negative relationship                                                                                                                                                                                                                                                                                                                                                                                    |
| <b>F15</b> | F8  | if rainfed crop production is expanded or intensified, more wind damages occur due to expansion of arable land – in the past farmers alone have removed wind barriers that were introduced with Republic Green plan to expand the arable land – consequently more wind damages occur                 | 1+: weak positive relationship                                                                                                                                                                                                                                                                                                                                                                                      |
| <b>F15</b> | F12 | if rainfed crop production is expanded or intensified, the higher water uptake by plants and less water available for water-dependent ecosystems and sectors                                                                                                                                         | 2-: medium negative relationship                                                                                                                                                                                                                                                                                                                                                                                    |
| <b>F15</b> | F13 | if rainfed crop production is expanded or intensified, water quality deteriorates due to the use of plant protection products and nutrients                                                                                                                                                          | 1-: weak negative relationship; less pollution than from settlements (nutrients), but still present in Vipava RB, fungicides in fruit growing, Viticulture                                                                                                                                                                                                                                                          |
| <b>F15</b> | F17 | if rainfed crop production is expanded or intensified, economic wealth gets higher – jobs guaranteed with higher income                                                                                                                                                                              | 1+: weak positive relationship                                                                                                                                                                                                                                                                                                                                                                                      |
| <b>F16</b> | F8  | if irrigated crop production is expanded or intensified, more wind damages occur due to expansion of arable land – in the past farmers alone have removed wind barriers that were introduced with Republic Green plan to expand the arable land – consequently more wind damages occur               | 1+: weak positive relationship; limitations for vegetable crop production in closed areas (greenhouses) as wind tends to damage infrastructure                                                                                                                                                                                                                                                                      |
| <b>F16</b> | F12 | if irrigated crop production is expanded or intensified, less water is available for water-dependent ecosystems and sectors                                                                                                                                                                          | 2-: medium negative relationship; Water is used for irrigation that means irreversible water use. Irrigation crop production is present mostly in the lower part of the basin, near water reservoir Vogršček and where irrigation systems are present and functioning. In the upper part of the basin, irrigation of agricultural land is also present and the Vipava River is the only water source for irrigation |

|            |     |                                                                                                                                                                                                                                                                                     |                                                                                                                                                                          |
|------------|-----|-------------------------------------------------------------------------------------------------------------------------------------------------------------------------------------------------------------------------------------------------------------------------------------|--------------------------------------------------------------------------------------------------------------------------------------------------------------------------|
| <b>F16</b> | F13 | if irrigated crop production is expanded or intensified, water quality deteriorates due to the increased use of plant protection products and fertilizers                                                                                                                           | 1-: weak negative relationship; less pollution than from settlements (nutrients), but still present in Vipava RB, fungicides in fruit growing, vegetable crop production |
| <b>F16</b> | F15 | if irrigated crop production is expanded or intensified, area intended for rainfed crop production decreases – only if no expansion of arable land is planned                                                                                                                       | 1-: weak negative relationship                                                                                                                                           |
| <b>F16</b> | F17 | if irrigated crop production is expanded or intensified, economic wealth increases – jobs guaranteed, self-sufficiency increases                                                                                                                                                    | 1+: weak positive relationship; due to low purchase prices, agriculture crop productions is not so strong(e.g. peaches)                                                  |
| <b>F17</b> | F7  | with increased economic wealth the expansion of settlement (individual houses) also occur and if the buildings extend into “problematic »terrain more landslides in periods of intense rainfall can occur due to inadequate regulation of storm water and hinterland water drainage | 1+: weak positive relationship; spatially limited impact – on the slopes                                                                                                 |
| <b>F17</b> | F12 | if economic wealth gets higher and the population increases, domestic water use decreases water availability                                                                                                                                                                        | 1-: weak negative relationship; less water is used compared to the past, some SH say that due to the economic crisis people care more about the consumption              |
| <b>F17</b> | F13 | if economic wealth and the population increases, water quality deteriorates (more waste, waste waters) – in basin small and dispersed settlements have insufficient drainage and municipal wastewater treatment that are causing organic pollution of the surface water             | 2-: medium negative relationship                                                                                                                                         |
| <b>F17</b> | F15 | if economic wealth and population growth increases, rainfed crop production can be expanded or intensified due to increase in demand for food                                                                                                                                       | 1+: weak positive relationship                                                                                                                                           |
| <b>F17</b> | F16 | if economic wealth and population growth increases, irrigated crop production can be expanded or intensified due to increase in demand for food                                                                                                                                     | 1+: weak positive relationship                                                                                                                                           |
| <b>F18</b> | F12 | if the industrial production increases (heavy industry), water availability decreases – industry using a great amount of water (Fructal, Mlinotest, Tekstina) impacts water availability (where the same water source is being used - Vipava river, Hubelj spring)                  | 1-: weak negative relationship; only if industry increases the consumption of water                                                                                      |

|            |     |                                                                                                                                                                                      |                                                                                                                                                                                                                                                              |
|------------|-----|--------------------------------------------------------------------------------------------------------------------------------------------------------------------------------------|--------------------------------------------------------------------------------------------------------------------------------------------------------------------------------------------------------------------------------------------------------------|
| <b>F18</b> | F16 | if the industrial production increases (food processing industry, beverage production), irrigated crop production is expanded or intensified due to the increase in demand for crops | 1+: weak positive relationship; industrial activities, food processing, beverage production purchase crops – right now as food processing industry is not so strong, low purchase prices for peaches allow only a small portion of irrigated crop production |
| <b>F18</b> | F17 | if the industrial production increases, economic wealth together with population growth increases                                                                                    | 1+: weak positive relationship; industrial activities (SME) are not so strong but still people work there and so the industry enables population development and economic wealth                                                                             |
